# Supplementary material for: Neuroarchitecture Assessment: An Overview and Bibliometric Analysis
Source: MDPI journal article supplement (doi:10.3390/ejihpe11040099), 2021-11-05
Supplement: s1 [file s1]

Supplementary material for the article titled:

# Neuroarchitecture Assessment: An Overview and Bibliometric Analysis

## Items in this Supplementary document:

- The search strings
- Table S1: Co-citation analysis by cited sources
- Table S2: Countries with the largest number of publications.
- Table S3: Ten most cited references

The search string:

TS= (("architecture" OR "built environment" OR "architectural space" OR "interior space" OR "environment Design" OR "physical environment") AND ("neuroscience" OR "neuro architecture" OR "neuroimaging" OR "brain imaging" OR "Brain Reponses" OR "Neural Activation" OR "neural responses"))

**Table S1.** Co-citation analysis by cited sources (top 20 most influential journals)

| Source                                                            | Documents | Citations | Total link strength |
|-------------------------------------------------------------------|-----------|-----------|---------------------|
| Journal of Frontiers in Psychology                                | 11        | 165       | 337                 |
| Building and Environment                                          | 10        | 383       | 61                  |
| Neuroimage                                                        | 9         | 591       | 119                 |
| Architectural Science Review                                      | 6         | 49        | 201                 |
| Cognitive Processing                                              | 6         | 51        | 75                  |
| Frontiers of Architectural Research                               | 6         | 16        | 173                 |
| Health Environments Research Design (HERD)                        | 6         | 49        | 116                 |
| Journal of Environmental Psychology                               | 6         | 266       | 171                 |
| Design                                                            | 5         | 0         | 0                   |
| International Journal of Environmental Research and Public Health | 5         | 51        | 95                  |
| Journal of Neuroscience                                           | 5         | 775       | 66                  |
| Plos One                                                          | 5         | 20        | 32                  |
| Cerebral Cortex                                                   | 4         | 395       | 38                  |
| Cognitive Computation                                             | 4         | 27        | 12                  |
| Nature Neuroscience                                               | 4         | 686       | 31                  |
| Nature Reviews Neuroscience                                       | 4         | 3935      | 88                  |

**Table S2.** Countries with the largest number of publications.

| Country     | Documents | Citations | Total link strength |
|-------------|-----------|-----------|---------------------|
| Usa         | 103       | 9849      | 8940                |
| England     | 42        | 2046      | 5157                |
| Australia   | 24        | 1445      | 3171                |
| Canada      | 17        | 570       | 4265                |
| Italy       | 22        | 554       | 1632                |
| Germany     | 17        | 471       | 2203                |
| Austria     | 5         | 431       | 1894                |
| South Korea | 5         | 394       | 281                 |
| Switzerland | 7         | 340       | 394                 |
| Spain       | 16        | 330       | 3378                |
| Denmark     | 7         | 277       | 2199                |
| Scotland    | 5         | 253       | 584                 |
| China       | 15        | 232       | 1027                |
| Netherlands | 12        | 183       | 949                 |
| Sweden      | 6         | 126       | 108                 |
| Singapore   | 5         | 76        | 643                 |
| Iran        | 9         | 28        | 1622                |
| Turkey      | 5         | 20        | 559                 |
| Mexico      | 5         | 18        | 438                 |

**Table S3.** Ten most influential publications

| Title                                                                                            | Co-citations | total link strength | Reference |
|--------------------------------------------------------------------------------------------------|--------------|---------------------|-----------|
| Shape matching and object recognition using shape contexts                                       | 3680         | 1                   | [79]      |
| Relations between the statistics of natural images and the response properties of cortical-cells | 1981         | 1                   | [80]      |
| The Lifelong Effects of Early Childhood Adversity and Toxic Stress                               | 1822         | 9                   | [86]      |
| Neural consequences of environmental enrichment                                                  | 1647         | 32                  | [87]      |
| Enriched environments, experience-dependent plasticity and disorders of the nervous system       | 1042         | 47                  | [88]      |
| Visual objects in context                                                                        | 891          | 25                  | [82]      |
| Representation of Geometric Borders in the Entorhinal Cortex                                     | 559          | 21                  | [83]      |
| Recalling routes around London: activation of the right hippocampus in taxi drivers              | 449          | 9                   | [81]      |
| Visuo-haptic object-related activation in the ventral visual pathway                             | 441          | 9                   | [90]      |
| The impacts of nature experience on human cognitive function and mental health                   | 369          | 14                  | [91]      |
